# Supplementary material
Source: PubMed Central journal article supplement (PMC3963575)
Supplement: supp_tpc.113.120048_tcp120048Supplemental.pdf [file supp_tpc.113.120048_tcp120048Supplemental.pdf]

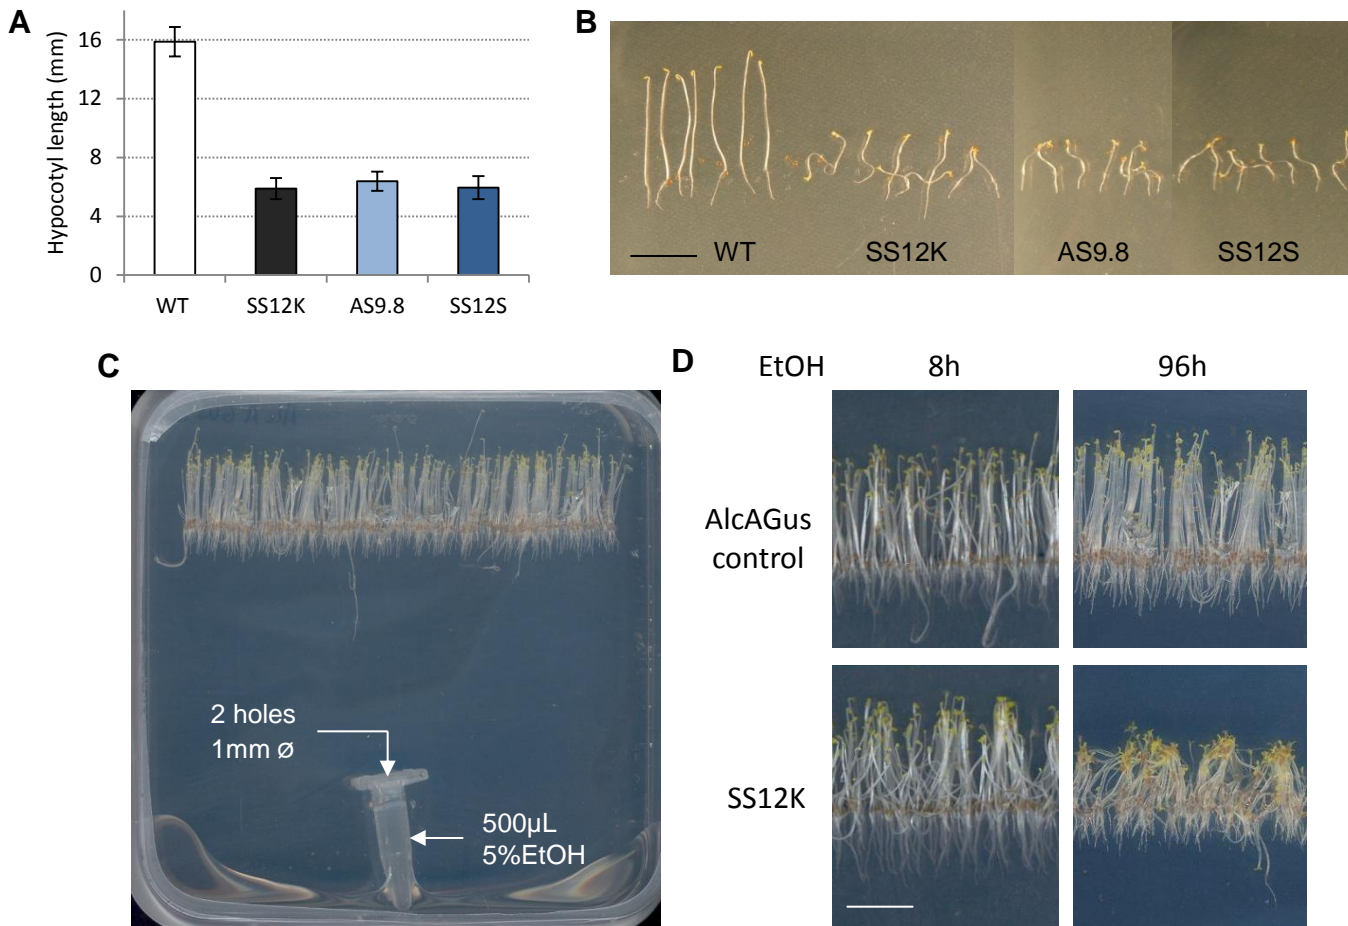

**Supplemental Figure 1: Dark grown phenotype of ABP1 knockdown lines**

**(A)** Hypocotyl length of 4-d-old dark grown seedlings grown in the presence of ethanol vapors. Length differences between WT and each ABP1 knockdown line are significant p value <0.01

**(B)** Phenotype of knockdown lines for ABP1 grown in darkness for 4 days, EtOH induction since germination

**(C)** Experimental disposal for ethanol induction via ethanol vapor

**(D)** Samples used for the transcriptomic analysis and real time PCR. After 8h of exposure to ethanol very subtle phenotypes are observed for SS12K. Bar represents 1cm

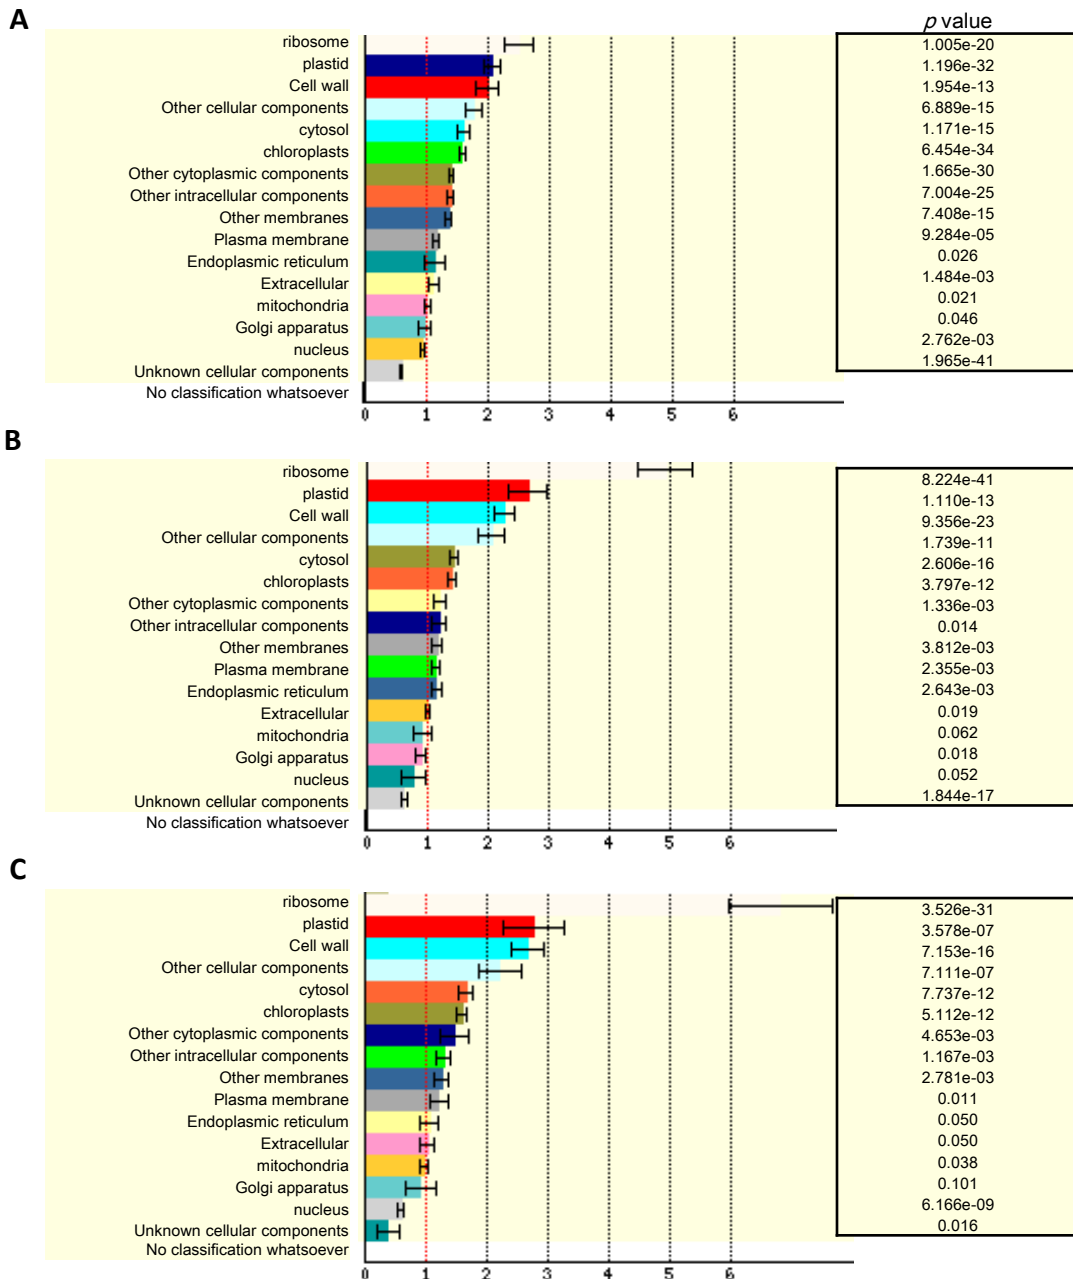

**Supplemental Figure 2: Overview of classes of genes differentially expressed after ABP1 inactivation in dark grown seedlings ordered by cellular component.**

**(A)** Comparison between SS12K and WT ethanol induced since germination (96h).

**(B)** Comparison between SS12K and WT ethanol induced only 8 h before harvesting.

**(C)** Genes in common between short- and long- term ABP1 inactivation

Analysis were performed using Functional Classification Super Viewer available at (<http://bar.utoronto.ca>) (Winter et al., 2007)

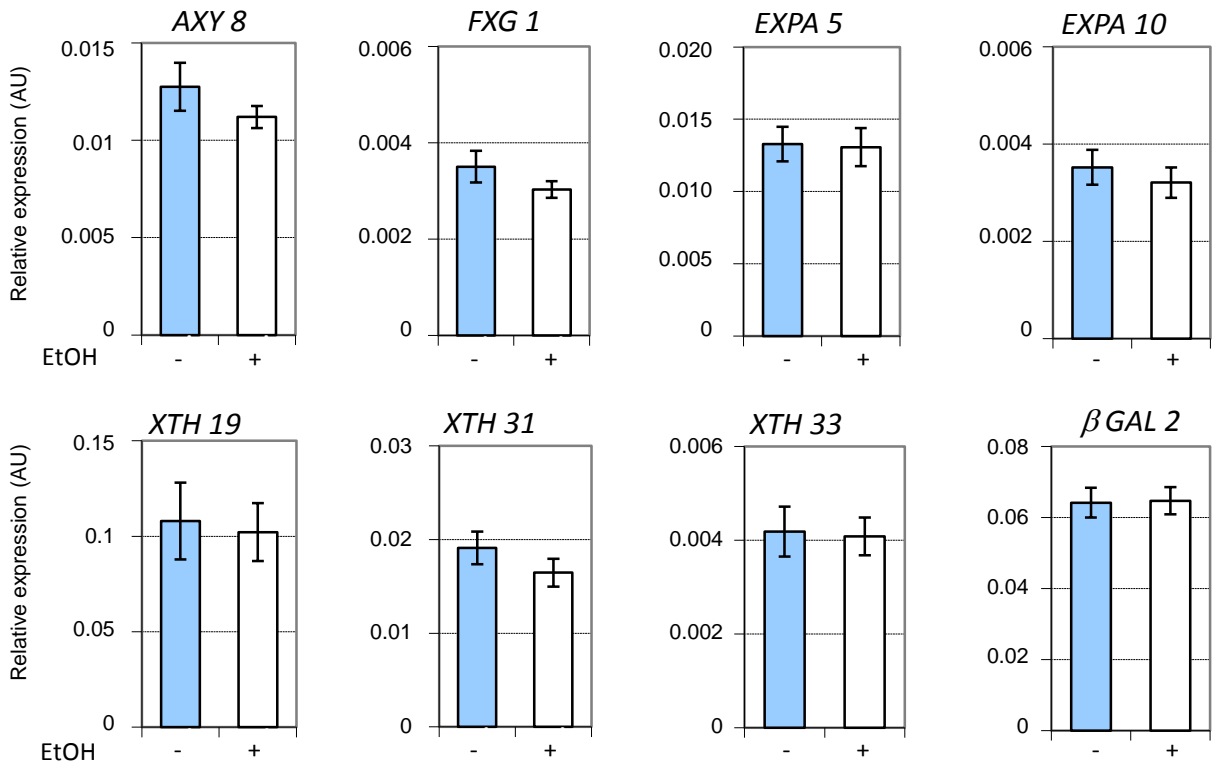

**Supplemental Figure 3: Expression of cell wall related genes after EtOH induction in WT**

RNA accumulation of a selection of XyG related genes was analysed by RT-PCR. All data were normalized with respect to *ACTIN2-8* and expressed in relative units. Data are means  $\pm$ SD (biological repeats n=9). None of the differences are statistically significant.

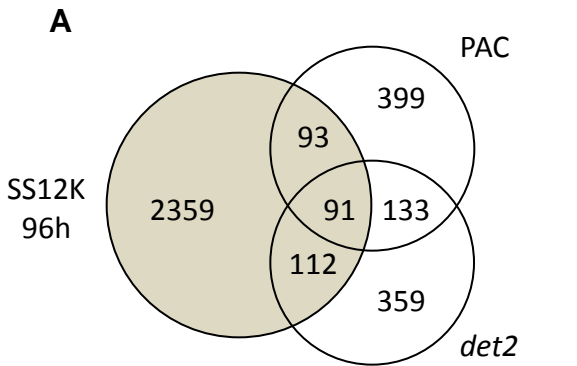

All genes affected by ABP1 knockdown (96h)  
vs  
all genes affected by PAC or by *det2* in darkness

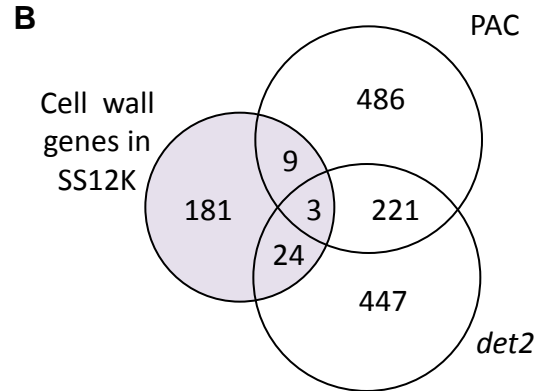

All Cell-wall genes affected by ABP1 knockdown  
vs  
all genes affected by PAC or by *det2* in darkness

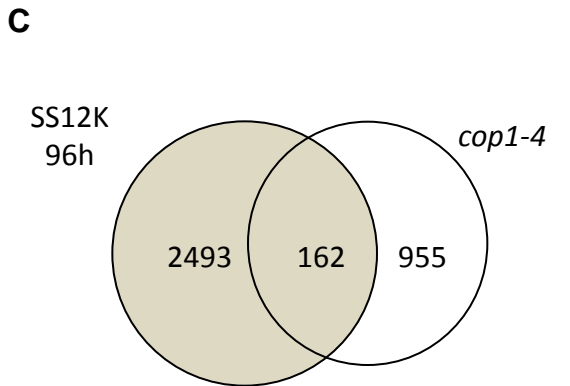

All genes affected by ABP1 knockdown (96h)  
vs  
all genes affected by *cop1-4* in darkness

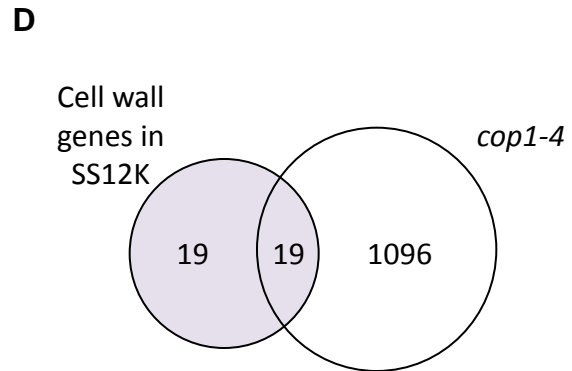

Cell-wall genes affected by ABP1 knockdown  
vs  
genes affected in *cop1-4* in darkness

**Supplemental Figure 4: Venn diagram resulting from meta-analysis comparing genes affected in ABP1 knockdown with genes affected in de-etiolated seedlings resulting from alteration in GA, BR or light signalling**

**(A)** Comparison between all genes affected in SS12K inactivated since germination (96h) with genes affected in Col0 treated with PAC or in *det2* mutant grown in darkness

**(B)** Comparison between cell wall related genes affected in ABP1 knockdown and genes affected in Col0 treated with PAC or in *det2* mutant grown in darkness

**(C)** Comparison between all genes affected in SS12K inactivated since germination (96h) with genes affected in dark grown *cop1-4*.

**(D)** Comparison between cell wall related genes affected in ABP1 knockdown and genes affected in dark grown *cop1-4*.

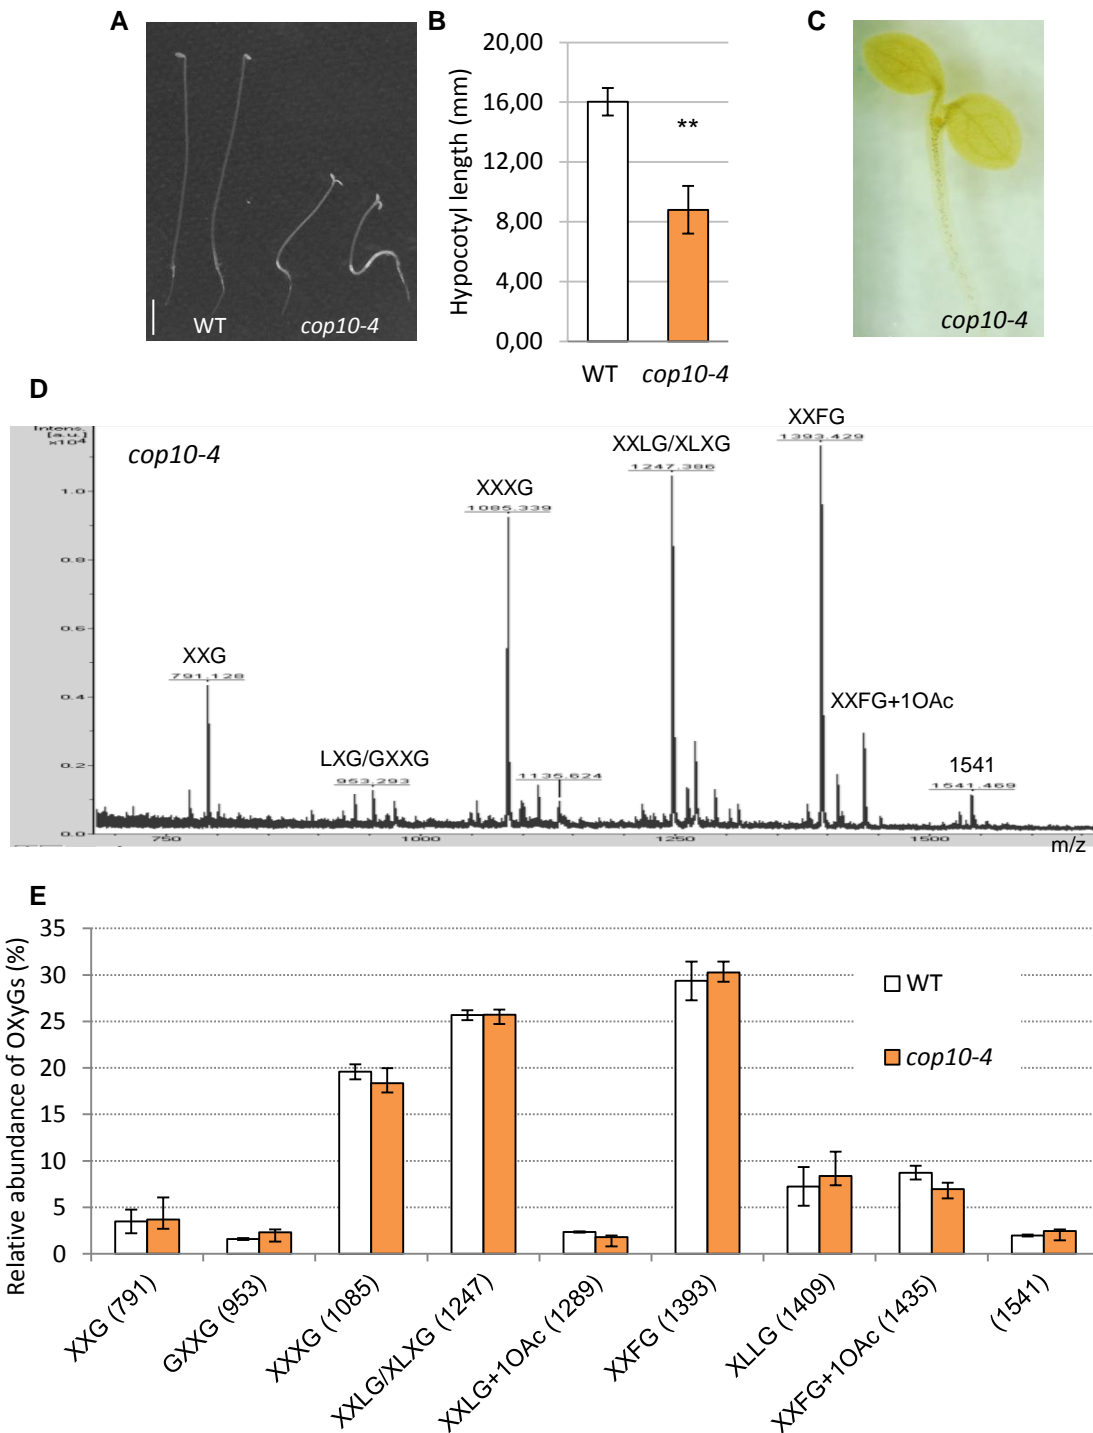

**Supplemental Figure 5: Comparison of xyloglucan composition of dark grown hypocotyls *cop10-4* de-etiolated mutant with WT**

(A) Phenotype of *cop10-4*, bar represents 25 mm

(B) Hypocotyl length of 4 day-old dark grown seedlings; p value \*\* <0.01 (n= 4 x 25)

(C) Lugol staining of *cop10-4*. Bar represents

(D) Representative spectrum of oligosaccharide mass profiling of OXGs of ethanol induced *cop10-4* hypocotyls grown in darkness for 4 days.

(E) Quantitative statistical analysis of OLIMP data for ethanol induced *cop10-4*. Data are compared with WT; Data are means  $\pm$ SD (biological replicates n=4). None of the differences are statistically significant

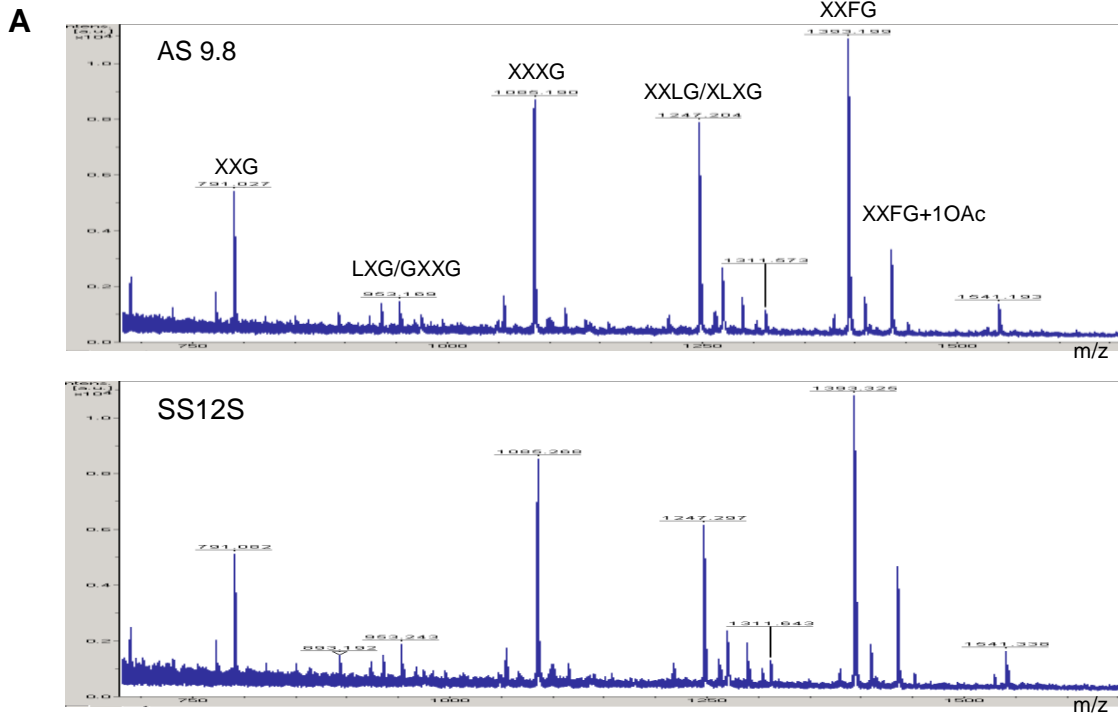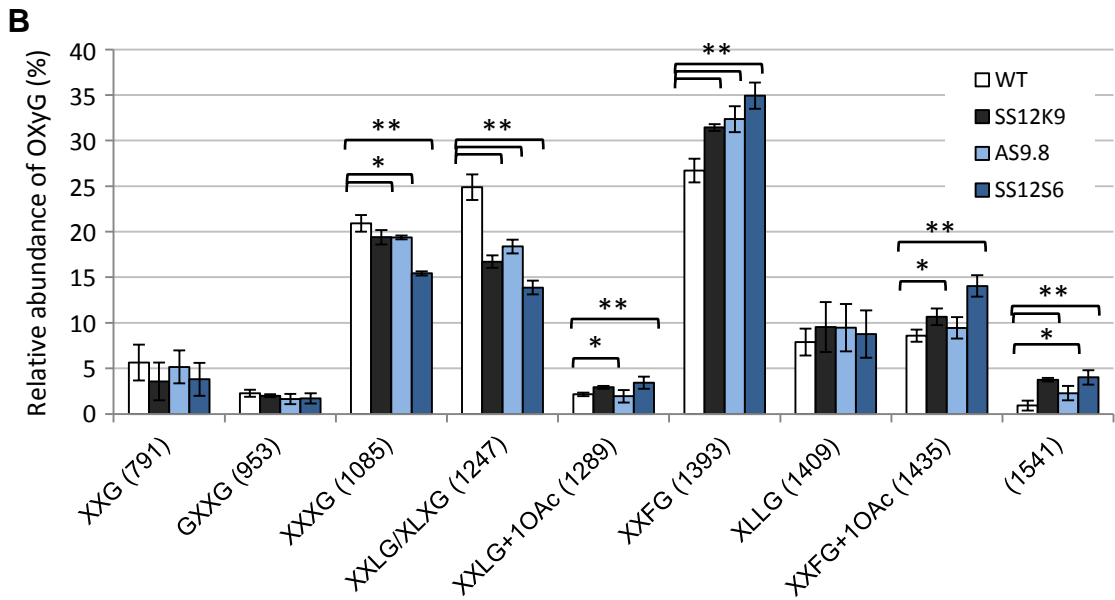

**Supplemental Figure 6: Xyloglucan composition in dark grown hypocotyls of various lines inactivated for ABP1**

**(A)** Representative spectrum of oligosaccharide mass profiling of OXGs of ethanol induced hypocotyls grown in the dark for 4 days of SS12S and AS9.8 lines.

**(B)** Quantitative statistical analysis of OLIMP data for ethanol induced SS12S and AS9.8 and comparison with WT and SS12K; data are means  $\pm$ SD (biological replicates n=4). P values \* < 0.05 and \*\* < 0.01

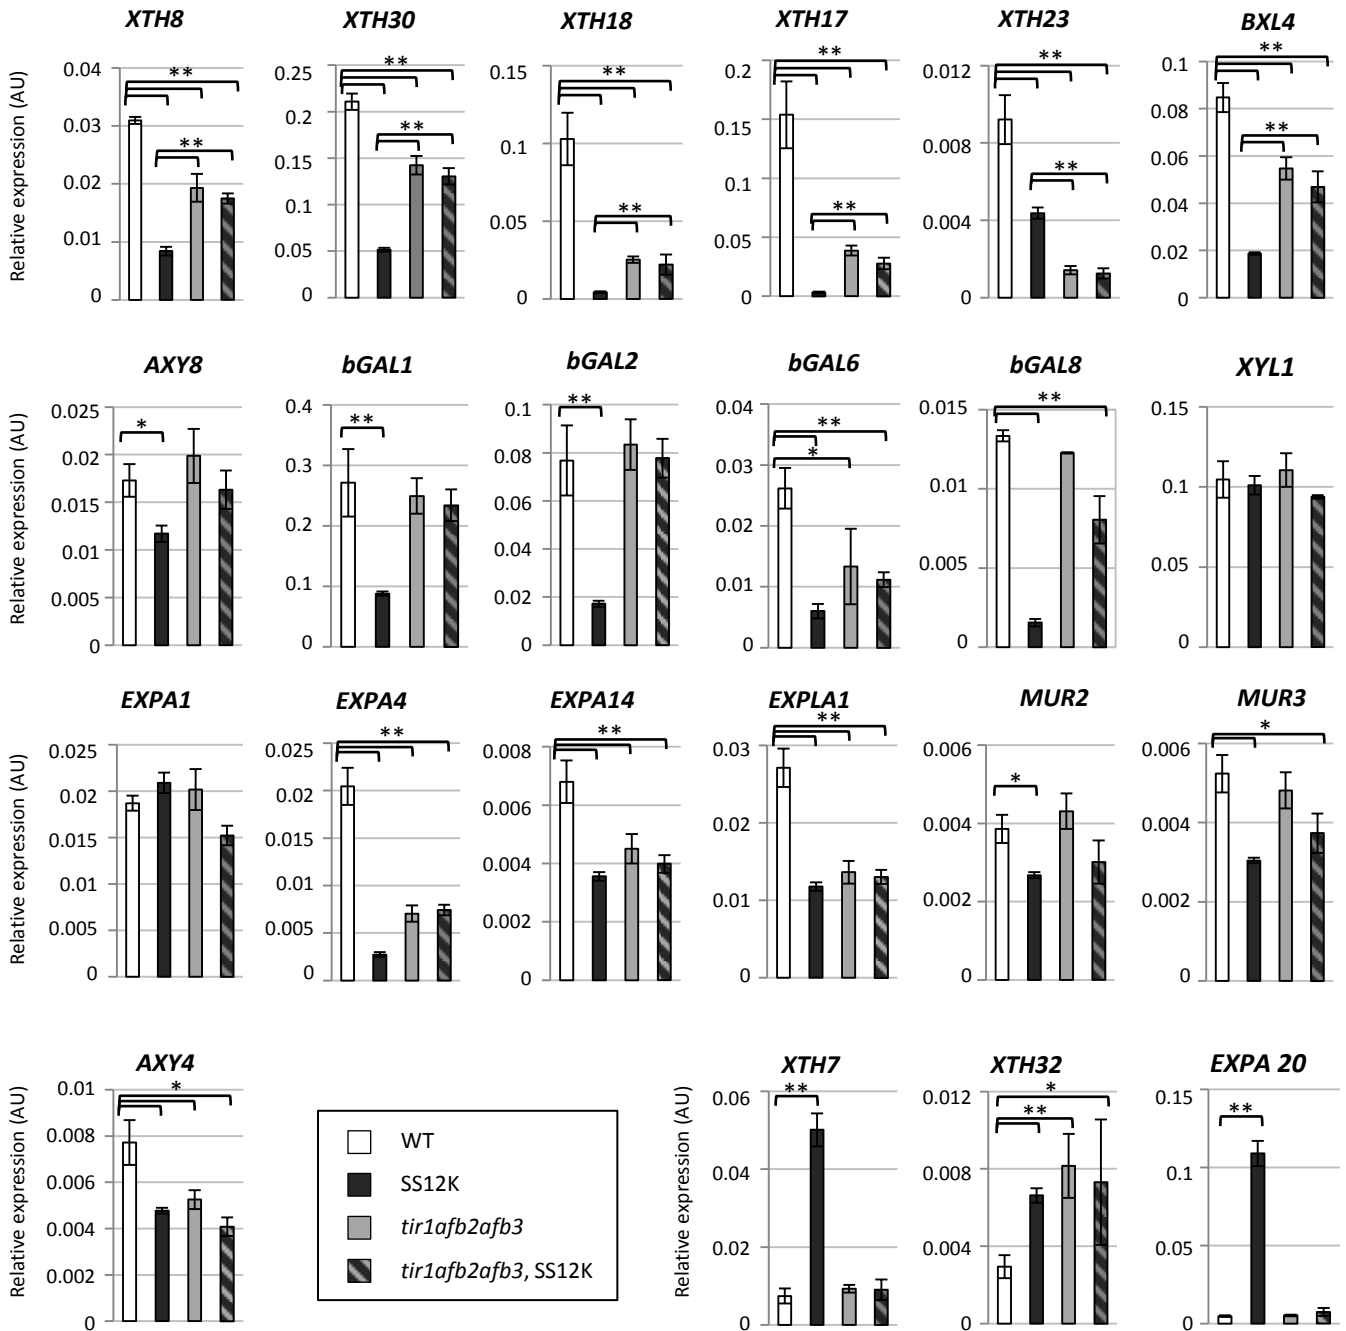

**Supplemental Figure 7: XyG gene expression analysed by real-time RT-PCR**

RNA accumulation of a selection of XyG related genes in the distinct genotypes as indicated. All data were normalized with respect to *ACTIN2-8* and expressed in relative units. Data are means  $\pm$ SD (biological repeats  $n=3$ , and two technical repeats for each). Statistical analysis was performed by comparing WT with other genotypes or SS12K with the triple mutants as indicated. \*  $p<0.05$  and \*\*  $p<0.01$

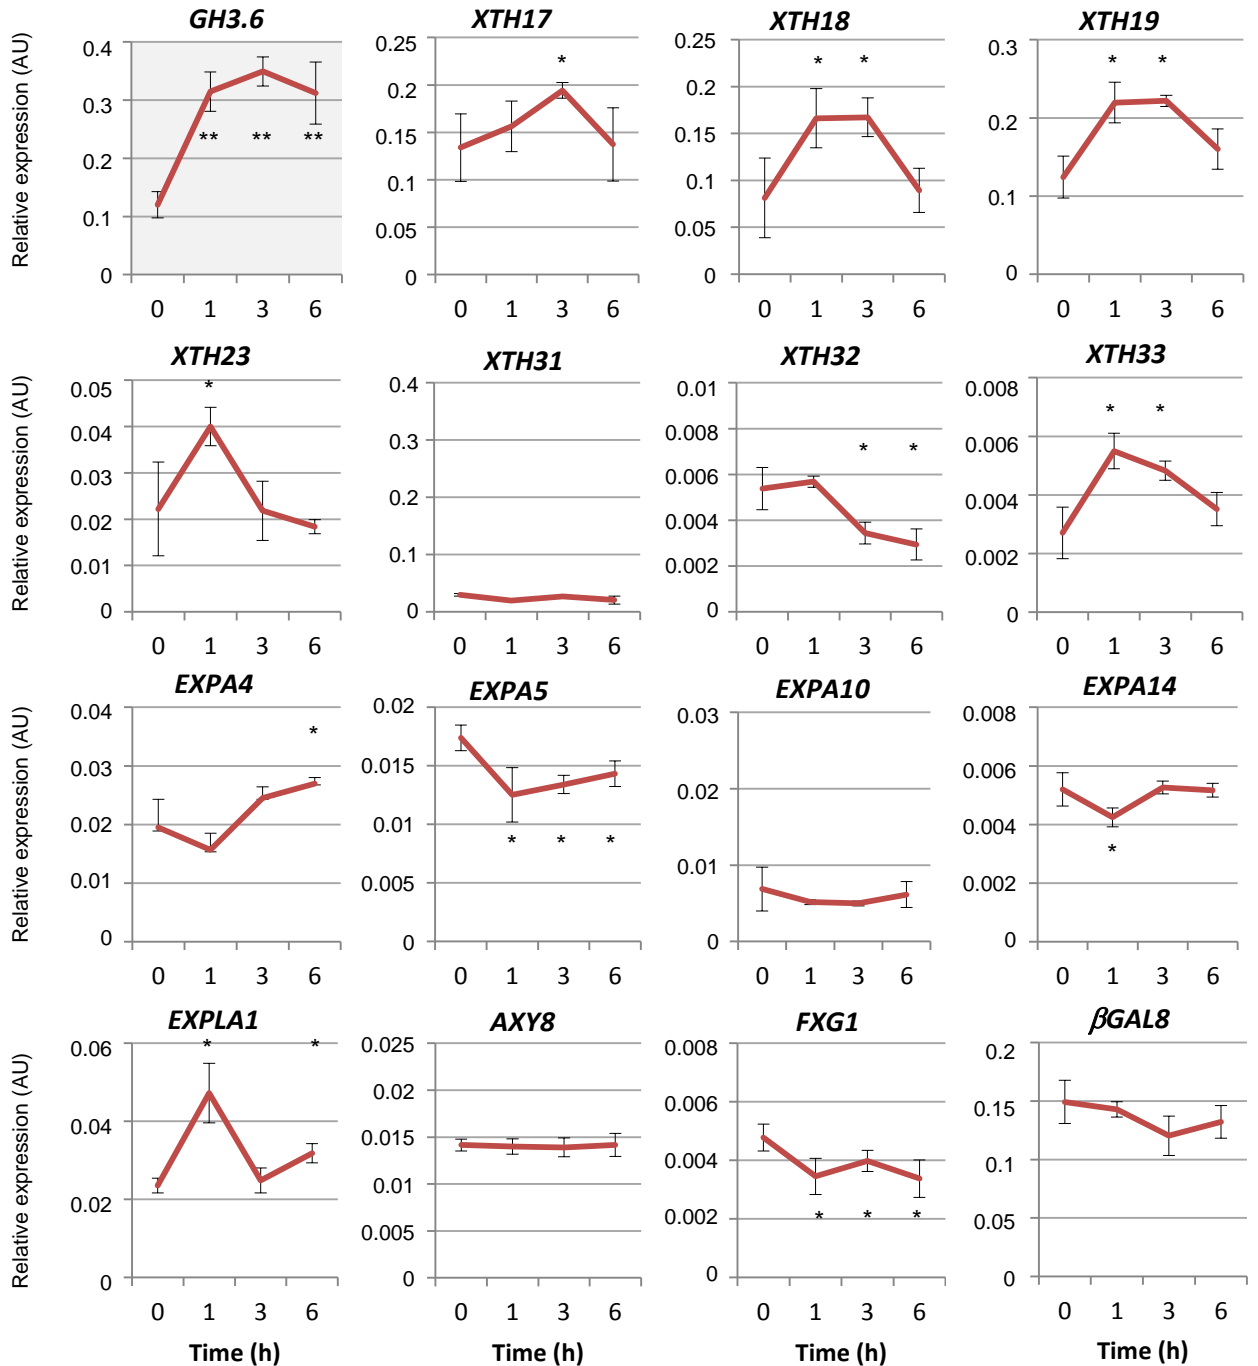

**Supplemental Figure 8: Auxin effect on expression of XyG remodelling genes**

Kinetics of mRNA accumulation of a selection of XyG related genes after 10 $\mu$ M IAA treatment of dark grown WT seedlings. All data were normalized with respect to *ACTIN2-8* and expressed in relative units. bars represent SD (biological repeats n=3, and two technical repeats for each). The early auxin response gene *GH3.6* was used as a positive control for auxin treatment. Statistical analysis was performed by comparing WT seedlings before and after auxin treatment \* p<0.05 and \*\* p<0.001



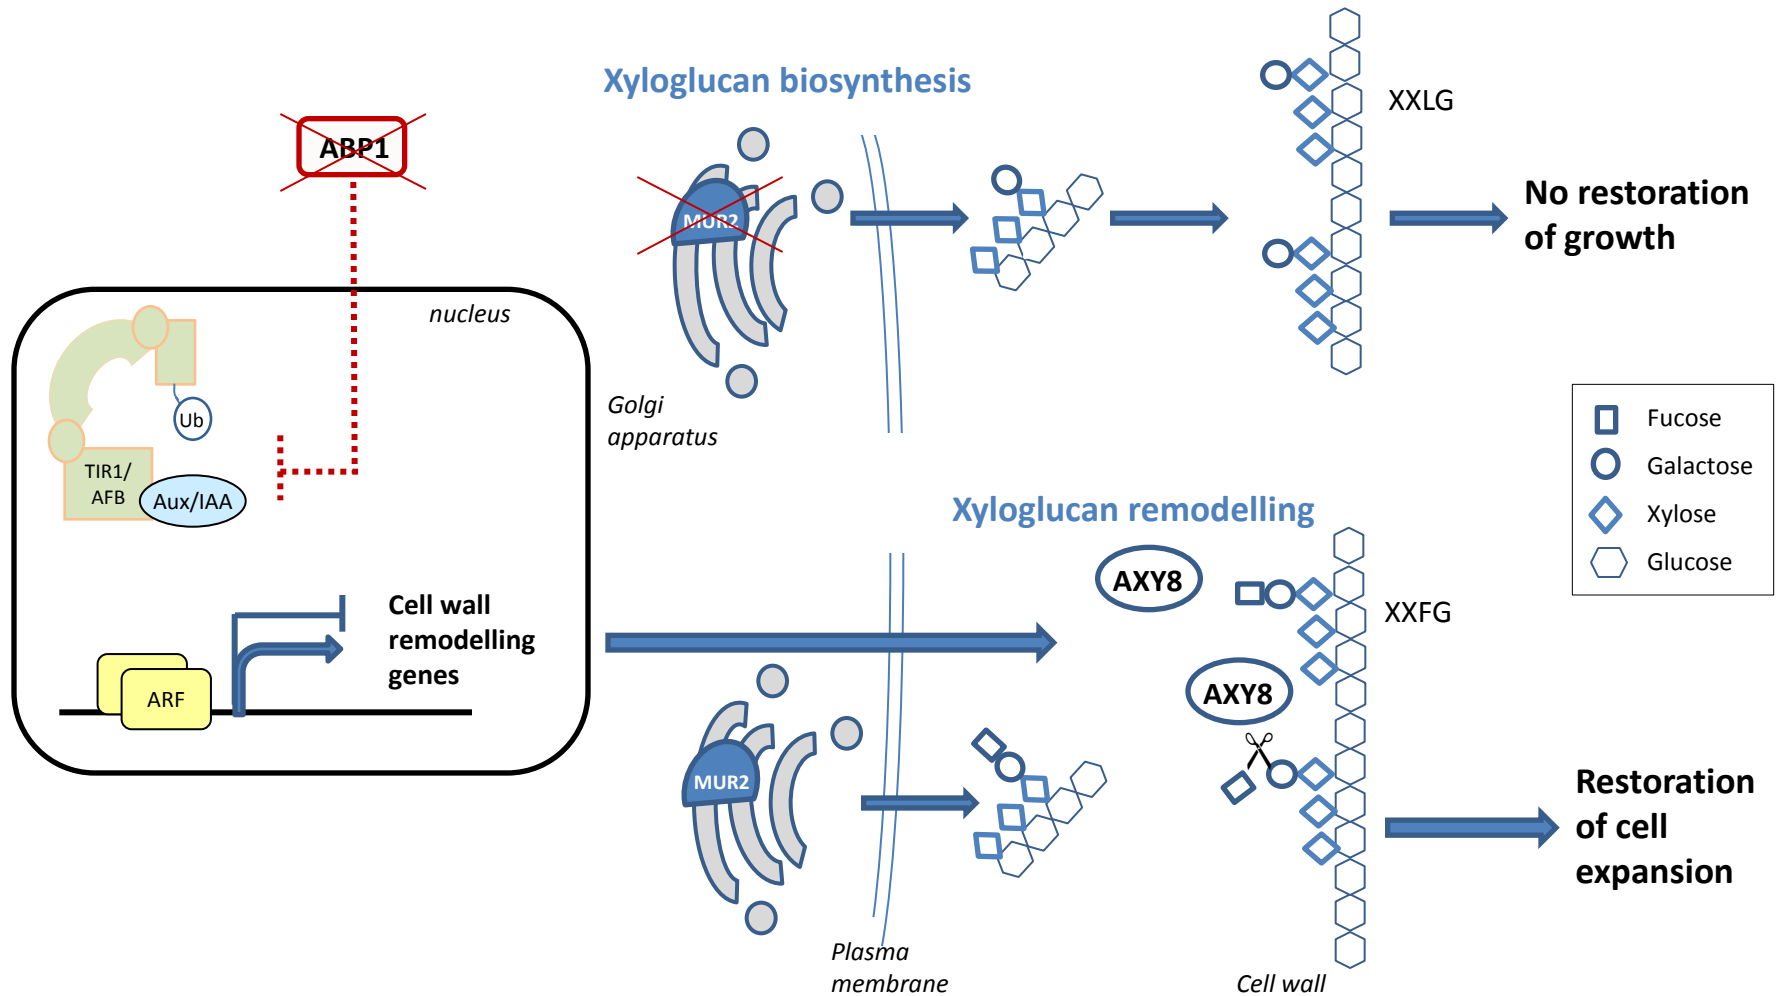

**Supplemental Figure 9: ABP1 acts on *in muro* xyloglucan composition to modulate cell expansion through an SCF<sup>TIR1/AFBs</sup> dependent pathway**

ABP1 is required for expression of cell wall remodelling genes. Cell expansion results from ABP1-dependent xyloglucan (XyG) remodelling. XyG fucosylation followed by *in muro* defucosylation are critical for cell expansion.

**Supplemental Table 1: Primer list**

| Gene name | AGI       | Forward primers                  | Revers primers                   | From                    |
|-----------|-----------|----------------------------------|----------------------------------|-------------------------|
| AXY4      | At1g70230 | 5'-ACCGTCTCTAGCCCTGATCTCGTCT     | 5'-CGCATGTCCAAGTCCAGACCTTCT      | Gilles et al., (2011)   |
| AXY8      | At4g34260 | 5'-TGATCTTGTGGATCCGTTGA          | 5'-GTGCCGAGCAAATATAGA            | Günl et al., (2011)     |
| bGAL1     | At3g13750 | 5'-GAATGGCAATCAACGCTGGTGAAC      | 5'-GTGCTACAGTTACAGAACACCAGTTCTGC | Iglesias et al., (2006) |
| bGAL2     | At3g52840 | 5'-TGATACACCGAGAGGCAACGAACC      | 5'-CAAGAGAGATTCCACTTGGATCACCACC  | Iglesias et al., (2006) |
| bGAL6     | At5g63800 | 5'-CCTGCTGGACAACCTTCTCAATCTATAT  | 5'-GAATTGAGATTGAGCTTGACTCGAACC   | Iglesias et al., (2006) |
| bGAL8     | At2g28470 | 5'-AACAGAACCAGGCCGTTTC           | 5'-GAAGCTTCAACAGCTAAGCTCTTGACGAC | Iglesias et al., (2006) |
| BXL4      | At5g64570 | 5'-TGAATGGTGGTCTGAAGCAC          | 5'-TATAACCTGCGGGAAACTCG          |                         |
| EXPA1     | At1g69530 | 5'-AAGGCTATGGAACCAACACG          | 5'-GCCAGGAAGACACCATTTTC          |                         |
| EXPA10    | At1g26770 | 5'-CCTTGCTCAGCCTGTTTTTC          | 5'-GCTTGCCACACTGTTCTTGA          |                         |
| EXPA14    | At5g56320 | 5'-CAATACCGGAGAGTGGCTTGCC        | 5'-TTGTTAGATATAACTGTACGGCC       |                         |
| EXPA20    | At4g38210 | 5'-AAAGTGAAGGGCCACACAAC          | 5'-TTGCCGCCTTTGAGAGTAAC          |                         |
| EXPA4     | At2g39700 | 5'-AAAGGATCACGGACTGGTTG          | 5'-GCTTGACCAACCAAAACAGC          |                         |
| EXPA5     | At3g29030 | 5'-ATAGAAGGGTTCGGTGCAAG          | 5'-TCCTCGACCCTTTCATTGAG          |                         |
| EXPAL1    | At3g45970 | 5'-GCGATTACGGCAACAAGAAC          | 5'-GACTTGAGCAATGTGCGATGG         |                         |
| FXG1      | At1g67830 | 5'-ATGTTGCCTGAATCCGACAGC         | 5'-TTAGCGAAGTAACCTGCTGTG         |                         |
| MUR2      | At2g03220 | 5'-TGGAGGTTTAAAGCCTTGGA          | 5'-TGTCAAAAGCACAAAATTGACTT       |                         |
| MUR3      | At2g20370 | 5'-CTTTGTGCCGTTCTATGCTG          | 5'-ATGAGCCAATCGACCAACTC          |                         |
| XTH17     | At4g37800 | 5'-GGGAAGCCGAGCATTGGGCA          | 5'-ACCATGGGGAATTCGCGGAACA        |                         |
| XTH18     | At1g11545 | 5'-AATGAGGCTTTACGCGAGTC          | 5'-AGGAGCCTTTGACCAATCTG          |                         |
| XTH19     | At4g30290 | 5'-TGACCAACCGCTAACTTTC           | 5'-CTTTGTTGGGAATGGGACTC          |                         |
| XTH23     | At4g25810 | 5'-GCTGGAAGTGTACCCGCTTAC         | 5'-TCAAAGTCAATCTCGTCCCATGT       | Lee et al., (2004)      |
| XTH30     | At1g32170 | 5'-GCTCTTACGCCACCATTTG           | 5'-ATAGGATCAACGGAGCAACC          |                         |
| XTH31     | At3g44990 | 5'-GGATGCATCGGACTGGGCCAC         | 5'-GCCATCTGCTGCCGGCTCAA          |                         |
| XTH32     | At2g36870 | 5'-CTCGGCTGCACCGCCTACTC          | 5'-TCCTAACGCCAACATTCCGGC         |                         |
| XTH33     | At1g10550 | 5'-CAATTCAGTAAGATCGCCATTG        | 5'-TTTGACACCAACCCAGCTC           |                         |
| XTH7      | At4g37800 | 5'-GATTCTGCCGGGACTGTCA           | 5'-CGTCTCGTACCGAATCGGTATC        | Lee et al., (2004)      |
| XTH8      | At1g11545 | 5'-ATAACGACACCGGATGTGGATT        | 5'-TTTAGCTTCATACTAAACCATCCGAAT   | Lee et al., (2004)      |
| XYL1      | At1g68560 | 5'-GGACATTAAGTAAGCCCTTGTGAGTTGCG | 5'-ATCCCTGAAGGAAAGCAGTGTCCAAGTG  |                         |

**Supplemental reference:**

**Winter, D., Vinegar, B., Nahal, H., Ammar, R., Wilson, G.V., and Provat, N.J.** (2007). An "electronic fluorescent pictograph" browser for exploring and analyzing large-scale biological data sets. PLoS ONE **2**, e718.
